# Supplementary material
Source: publisher site journal article supplement (https://www.spandidos-publications.com/1647/downloadSupplementary)
Supplement: Supplementary file 1 [file downloadSupplementary]

## Sheet: Sheet1
Table SII. Types of HPV.
HPV type	HSIL, n (%)	LSIL, n (%)
HPV16	37 (56.1)	8 (22.2)
HPV58	6 (9.1)	5 (13.9)
Othera HPV type	14 (21.2)	15 (41.7)
Unknown	9 (13.6)	8(22.2)
Total	66 (100.0)	36 (100.0)
aOther HPV types include types 44, 45, 52, 53 and 61. None of HPV subtype exceed 8 in Other HPV type group. HSIL, high-grade squamous intraepithelial lesion; LSIL, low-grade SIL; HPV, human papilloma virus.
